# Supplementary material
Source: PubMed Central journal article supplement (PMC1569161)

**Start**

\*

atgatcttcattttgaccgtaaacttccggttgagatatttaatcttactgatttgcaag  
M I F I L T V N F R W R Y L I L L I C K  
tctttaatgttgctggaaatcagttgtccggtgaaatacccggagaggttccctcggagtt  
S L M L L E I S C P V K Y P E R F L G V  
tgcgatactttgatctttcgtcaaacttgtttacaggagatattccgaggtacttgtcgg  
C D T L I F R Q T C L Q E I F R G T C R  
atttgtctcagttgctttttattaatctttcttacaatcgtttttccggcgaaattccgg  
I C L S C F L L I F L T I V F P A K F R  
cgagtattggtcggcttcagcagcttcagtacctttggctcgcgtataatgacttggttg  
R V L V G F S S F S T F G S R I M T W L  
gaactttgccttcggcaattgctaactgttcgtcgttggttcattgagtgcttaaggaaa  
E L C L R Q L L T V R R W F I E C L R K  
tgctattcgaggtgttattccagcggcaattgctgctttaccaaaagcttcaggtgatatc  
C Y S R C Y S S G N C C F T K A S G D I  
tttatcacatactactctgtctggttctttgccagcttcattgttctgcaatgtttcgat  
F I T Y Y S V W F F A S F I V L Q C F D  
ttatcctccttcccttgggattgttcagttgggtttcaatggggtttacggatattgtcaa  
L S S F P W D C S V G F Q W V Y G Y C Q  
gcaagagtcagcaaaatgttttacttcccttgcaaattttggatcttcaacacaaccaat  
A R V S K M F Y F L A N F G S S T Q P N  
acatgggtgcgtttcctttgattttgacgaacaattctgcattgacgtcgttggacgtatc  
T W C V S F D F D E Q F C I D V V G R I  
gtggaatttgttctctgggaaaatcccaagtgccattgggaacttgtggagattggagtt  
V E F V L W E N P K C H W E L V E I G V  
actgagaatgggaaacaattcattgataggtggctctcccgttttcgattacgaactgggtg  
T E N G K Q F I D R W S P V F D Y E L V  
cagcttgaagggttcttgttctataaggggaatcgaatgaaggggaaaattccaatgttttt  
Q L E G S C S I R E S N E G E N S N V F  
aggttatctcagaagcttgaagacattatcactgggaagaaatcagttttcgggttccat  
R L S Q K L E D I I T G K K S V F G F H  
Tccttcgcgtttgtgaaa \* tgggtctcaacggaagtttacgggtcaac  
S F A F V K F D **Stop**

3' UTR

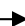

Supplement: pnas_0605805103_2.pdf [file pnas_0605805103_2.pdf]
