# Supplementary material
Source: PubMed Central journal article supplement (PMC1569161)

M A B C D E F

3000 ←  
2000 ←  
1000 ←

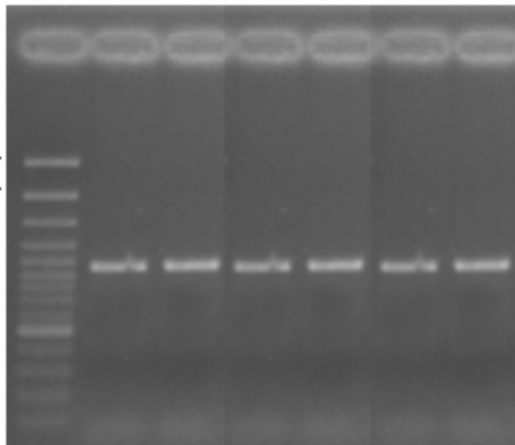

→ 981 bp

Supplement: pnas_0605805103_1.pdf [file pnas_0605805103_1.pdf]

**A B C**

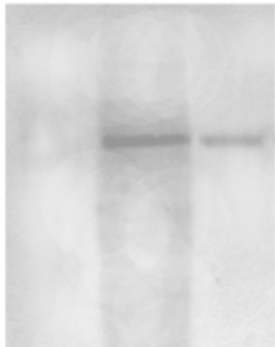

**35 kDa**

Supplement: pnas_0605805103_3.pdf [file pnas_0605805103_3.pdf]
